# Supplementary material for: Toxic Effects of Perilla frutescens (L.) Britt. Essential Oil and Its Main Component on Culex pipiens pallens (Diptera: Culicidae)
Source: MDPI journal article supplement (doi:10.3390/plants12071516), 2023-03-31
Supplement: s1 [file s1]

## Supplementary materials

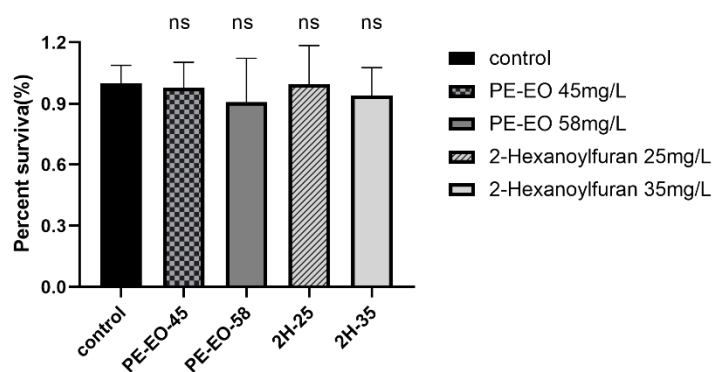

**Figure S1.** Effects of Perilla essential oil (PE-EO) and 2-hexanoylfuran against 297T cells. The data are given as Mean $\pm$ SD. Abbreviation: ns, not significant ( $P>0.05$ ) compared with the control according to Student's t-test.

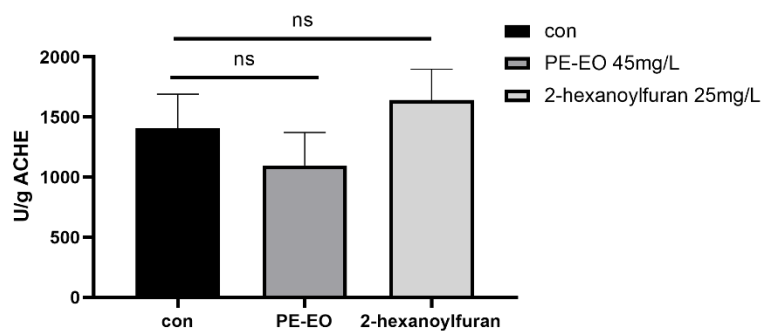

**Figure S2.** The acetylcholinesterase (AChE) activity of third instar larvae of *Cx. pipiens pallens* after treatment with Perilla essential oil (PE-EO) and 2-hexanoylfuran. The data are given as Mean $\pm$ SD. Abbreviation: ns, not significant ( $P>0.05$ ) compared with the control according to Student's t-test.
